# Supplementary material
Source: Springer Nature journal article supplement (https://www.springermedizin.de/resource/supplementary/13058_2009_2559_MOESM4_ESM.pdf/9701698)

**(A)**

《Tamoxifen+Taxane》

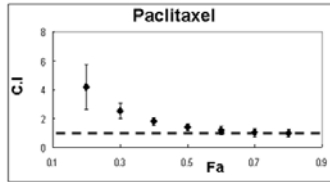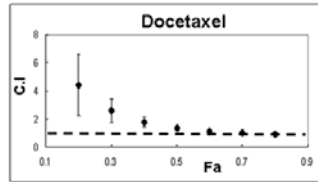

《Fulvestrant+Taxane》

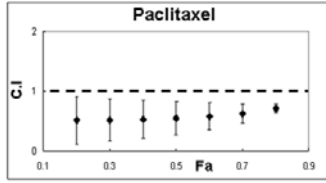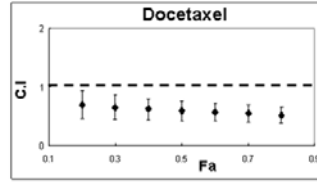**(B)**

《Tamoxifen+ Paclitaxel》

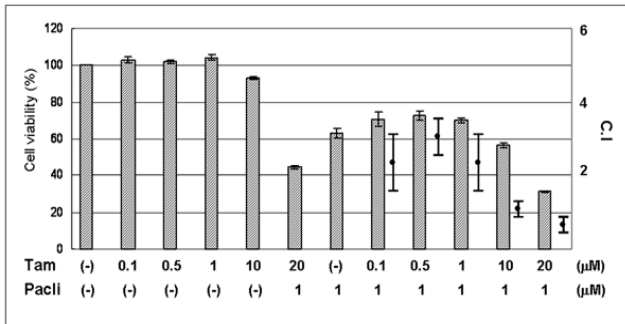

《Fulvestrant + Paclitaxel》

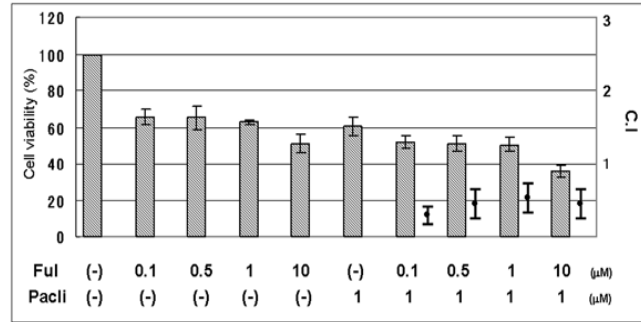**(C)**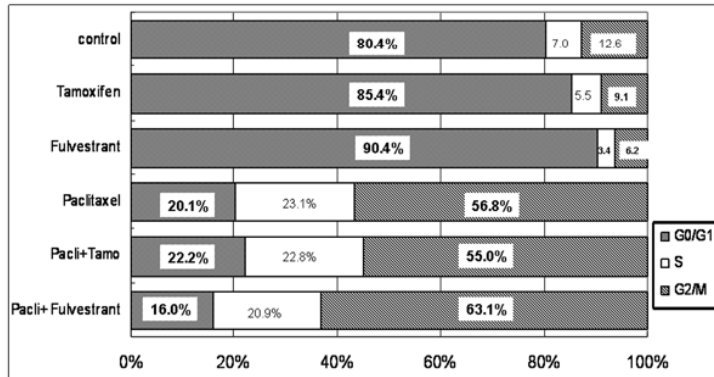**(D)**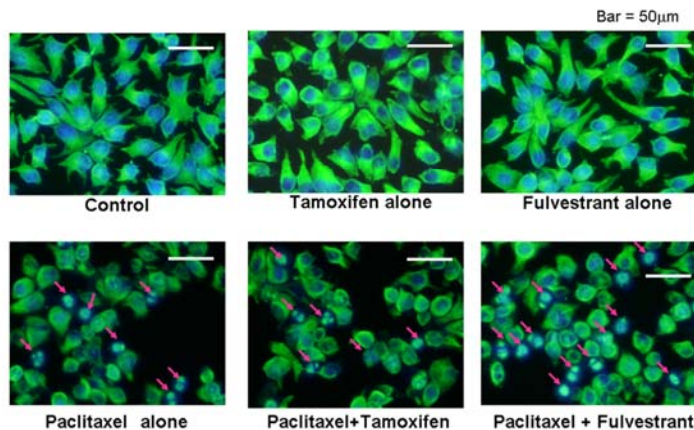

Supplement: MOESM4 [file 9701698]
